# Supplementary material for: Stakeholder perceptions of communication about vaccination in two regions of Cameroon: A qualitative case study
Source: PubMed Central journal article supplement (PMC5578665; doi:10.1371/journal.pone.0183721), 2017-08-31
Supplement: pone.0183721.s001.pdf [file pone.0183721.s001.pdf]

Mini survey results polio

Day 1

Total asked: 116

1) Do you know which disease we are vaccinating against today?

|     |    |     |
|-----|----|-----|
| Yes | 68 | 59% |
| no  | 48 | 41% |

2) Have you heard about the new cases of polio?

|     |    |     |
|-----|----|-----|
| Yes | 33 | 28% |
| no  | 83 | 72% |

3) Do you know that there was going to be a campaign this weekend?

|     |    |     |
|-----|----|-----|
| Yes | 30 | 26% |
| no  | 86 | 74% |

4) If yes how did you hear about the campaign (some mentioned more than one source)

| Clinic | Don't know | Media | Didn't answer | Neighbours | Radio | School | Tv | Door 2 door |
|--------|------------|-------|---------------|------------|-------|--------|----|-------------|
| 3      | 1          | 2     | 2             | 1          | 7     | 1      | 12 | 1           |

5) What is the easiest way to inform you about the vaccination campaigns? (some mentioned more than one source)

| any | campaign | Church | Clinic | Don't know | Door 2 door | Media | Newspaper | Poster | Radio | Sms | Telephone | TV |
|-----|----------|--------|--------|------------|-------------|-------|-----------|--------|-------|-----|-----------|----|
| 1   | 1        | 3      | 11     | 7          | 13          | 13    | 2         | 3      | 19    | 4   | 5         | 55 |

Day 2

Total asked: 83

1) Do you know which disease we are vaccinating against today?

|     |    |     |
|-----|----|-----|
| Yes | 37 | 46% |
| no  | 46 | 54% |

2) Have you heard about the new cases of polio?

|     |    |     |
|-----|----|-----|
| Yes | 31 | 37% |
| no  | 52 | 63% |

3) Do you know that there was going to be a campaign this weekend?

|     |    |     |
|-----|----|-----|
| Yes | 33 | 40% |
| no  | 50 | 60% |

4) If yes how did you hear about the campaign (some mentioned more than one source)

| Clinic | Announcement | Market | Don't know | Media | Didn't answer | Neighbours | Radio | School | Tv | Door 2 door |
|--------|--------------|--------|------------|-------|---------------|------------|-------|--------|----|-------------|
| 1      | 1            | 1      | 0          | 5     | 0             | 2          | 8     | 0      | 14 | 2           |

5) What is the easiest way to inform you about the vaccination campaigns? (some mentioned more than one source)

| any | campaign | Church | Clinic | Don't know | Door 2 door | Media | Newspaper | Poster | Quarter head | Radio | Sms | Telephone | TV | Word of mouth |
|-----|----------|--------|--------|------------|-------------|-------|-----------|--------|--------------|-------|-----|-----------|----|---------------|
| 2   | 0        | 1      | 1      | 4          | 11          | 8     | 0         | 0      | 1            | 13    | 5   | 3         | 39 | 2             |

Total Day 1 and 2

Total asked: 199

1) Do you know which disease we are vaccinating against today?

|     |     |     |
|-----|-----|-----|
| Yes | 105 | 53% |
| no  | 94  | 47% |

2) Have you heard about the new cases of polio?

|     |     |     |
|-----|-----|-----|
| Yes | 64  | 32% |
| no  | 135 | 68% |

3) Do you know that there was going to be a campaign this weekend?

|     |     |     |
|-----|-----|-----|
| Yes | 63  | 32% |
| no  | 136 | 68% |

4) If yes how did you hear about the campaign (some mentioned more than one source)

| Clinic | Market | Don't know | Media | Didn't answer | Neighbours | Radio | School | tv | Door 2 door |
|--------|--------|------------|-------|---------------|------------|-------|--------|----|-------------|
| 4      | 1      | 1          | 8     | 2             | 3          | 15    | 1      | 26 | 3           |

5) What is the easiest way to inform you about the vaccination campaigns? (some mentioned more than one source)

| any | campaign | Church | Clinic | Don't know | Door 2 door | Media | Newspaper | Poster | Quarter head | Radio | Sms/ Telephone | Tv | Word of mouth |
|-----|----------|--------|--------|------------|-------------|-------|-----------|--------|--------------|-------|----------------|----|---------------|
| 3   | 1        | 4      | 12     | 11         | 24          | 21    | 2         | 3      | 1            | 29    | 17             | 94 | 2             |
