# Supplementary material for: Stakeholder perceptions of communication about vaccination in two regions of Cameroon: A qualitative case study
Source: PubMed Central journal article supplement (PMC5578665; doi:10.1371/journal.pone.0183721), 2017-08-31
Supplement: pone.0183721.s002.pdf [file pone.0183721.s002.pdf]

## Mini survey results Rotavirus

Day 1

Total asked: 116

1) Have you hear that there is a new vaccine for babies 0-11 months?

|     |    |     |
|-----|----|-----|
| Yes | 65 | 56% |
| no  | 51 | 44% |

2) Do you know what the vaccine is given for (asked to those who said they had heard about it)?

|              |    |     |
|--------------|----|-----|
| Yes          | 37 | 57% |
| No/incorrect | 28 | 43% |

3) If yes how did you hear about the new vaccine (some mentioned more than one source)

| Church | Clinic | Don't know | Media | Neighbors | Newspaper | Radio | School | Tv |
|--------|--------|------------|-------|-----------|-----------|-------|--------|----|
| 1      | 11     | 3          | 3     | 1         | 1         | 5     | 1      | 43 |

Day 2

Total asked: 83

1) Have you hear that there is a new vaccine for babies 0-11 months?

|     |    |     |
|-----|----|-----|
| Yes | 53 | 64% |
| no  | 30 | 36% |

2) Do you know what the vaccine is given for (asked to those who said they had heard about it)?

|              |    |     |
|--------------|----|-----|
| Yes          | 26 | 49% |
| No/incorrect | 27 | 51% |

3) If yes how did you hear about the new vaccine (some mentioned more than one source)

| At the launch | Church | Clinic | Don't know | Family | Media | Neighbors | Newspaper | Poster | Radio | School | Tv |
|---------------|--------|--------|------------|--------|-------|-----------|-----------|--------|-------|--------|----|
| 1             | 0      | 5      | 5          | 2      | 5     | 4         | 0         | 1      | 4     | 1      | 24 |

Total Day 1 and 2

Total asked: 199

1) Have you hear that there is a new vaccine for babies 0-11 months?

|     |     |     |
|-----|-----|-----|
| Yes | 118 | 59% |
| no  | 81  | 41% |

2) Do you know what the vaccine is given for (asked to those who said they had heard about it)?

|              |    |     |
|--------------|----|-----|
| Yes          | 63 | 53% |
| No/incorrect | 55 | 47% |

3) If yes how did you hear about the new vaccine (some mentioned more than one source)

| At the launch | Church | Clinic | Don't know | Family | Media | Neighbors | Newspaper | Poster | radio | school | TV |
|---------------|--------|--------|------------|--------|-------|-----------|-----------|--------|-------|--------|----|
| 1             | 1      | 16     | 8          | 2      | 8     | 5         | 1         | 1      | 9     | 2      | 67 |
